# Supplementary material for: Reproducibility of a Rapid Human Papillomavirus Test at Different Levels of the Healthcare System in Tanzania: The AISHA Study
Source: Oxford University Press journal article supplement (doi:10.1158/1055-9965.epi-20-0422), 2020-08-20
Supplement: 10559965epi200422-sup-239562_2_supp_6433655_qdm66h.docx [file 10559965epi200422-sup-239562_2_supp_6433655_qdm66h.docx]

**Supplementary Table S1.** Overview of services/infrastructure and staff at each health centre

|  |  | **Services/Infrastructure** |  | **Staff** |
| --- | --- | --- | --- | --- |
| **National level centres** | | |  |  |
|  | NRL | Complete range of services, including chemistry, haematology, pathology, cytology, histopathology, immunohistochemistry, back-up generator |  | Technicians (diploma holders) (3 years study): 6 Advanced technicians (diploma holders) (5 years study): 4 Lab scientists: 3 |
| **Dar es Salaam centres** | | |  |  |
|  | ReH | Chemistry, haematology, CD4 counts, parasitology, back-up generator |  | Technicians (diploma holders):5 Advanced technicians (diploma holders): 2 Lab scientists: 1 |
|  | DiH | Haematology, chemistry, ELISA, CD4 counts, testing for blood transfusion, serology, microbiology culture, back-up generator |  | Technicians (diploma holders): 14 Advanced technicians (diploma holders): 3 Lab scientists: 4  Lab assistants (certificate holders): 3 |
|  | PHC | Basic services: parasitology (stools, sputum [TB]), blood (counts, glucose, pregnancy tests, syphilis tests, HIV), no back-up generator |  | Technicians (diploma holders): 4 |
| **Kilimanjaro centres** | | |  |  |
|  | ReH | Complete range of services, including chemistry, haematology, pathology, cytology, histopathology, immunohistochemistry, back-up generator |  | Technicians (diploma holders): 8  Lab scientists: 28 Lab assistants (certificate holders): 4 |
|  | DiH | Chemistry, haematology, parasitology, and CD4 counts, no back-up generator (usually the power supply is smooth) |  | Technicians (diploma holders): 2 Lab scientists: 1 Lab assistants (certificate holders): 3 |
|  | PHC | Basic services: blood slide malaria, sputum (TB), stools, urine, pregnancy test, HIV test, no back-up generator |  | Lab assistants (certificate holders): 1 |
