# Supplementary material for: Reproducibility of a Rapid Human Papillomavirus Test at Different Levels of the Healthcare System in Tanzania: The AISHA Study
Source: Oxford University Press journal article supplement (doi:10.1158/1055-9965.epi-20-0422), 2020-08-20
Supplement: 10559965epi200422-sup-239562_2_supp_6433658_qdmc6h.docx [file 10559965epi200422-sup-239562_2_supp_6433658_qdmc6h.docx]

**Supplementary Table S4.** Median cluster size of HPV positive results by recruiting centre, retesting laboratory, and region

|  | | Dar es Salaam | |  | Kilimanjaro | |
| --- | --- | --- | --- | --- | --- | --- |
| Positive samples  n | Cluster size  Median (IQR) |  | Positive samples  n | Cluster size  Median (IQR) |
| Samples tested locally | |  |  |  |  |  |
|  | PHC | 38 | 2 (1-2) |  | 33 | 2 (2-5) |
|  | DiH | 41 | 2 (1-3) |  | 38 | 2 (1-3) |
|  | ReH | 123 | 16 (3-22) |  | 23 | 1 (1-2) |
| Samples re-tested | |  |  |  |  |  |
|  | ReH | 154 | 7 (2-48) |  | 64 | 2 (1-3) |
|  | NRL | 132 | 2 (1-2) |  | 104 | 2 (1-4) |
| HPV: by *care*HPVTM test; PHC: primary healthcare centre; DiH: district hospital; ReH: regional/reference hospital; NRL: national reference laboratory; IQR: interquartile range | | | | | | |
